# Supplementary material for: Control of Brown Rot Produced by Monilinia fructicola in Peaches Using a Full-Spectrum Extract of Zuccagnia punctata Cav.
Source: MDPI journal article supplement (doi:10.3390/horticulturae9101141), 2023-10-17
Supplement: s1 [file s1]

## Supporting Information

### **Control of brown rot produced by *Monilinia fructicola* in peaches using a full-spectrum extract of *Zuccagnia punctata* Cav.**

Melina G. Di Liberto<sup>1</sup>, María Inés Stegmayer<sup>2</sup>, Laura N. Fernández<sup>2</sup>, Ariel D. Quiroga<sup>3</sup>, Laura A. Svetaz<sup>1\*</sup> and Marcos G. Derita<sup>1,2\*</sup>

<sup>1</sup> Farmacognosia, Facultad de Ciencias Bioquímicas y Farmacéuticas, Universidad Nacional de Rosario, Suipacha 531, S2002LRK, Rosario, Argentina; mdiliberto@fbioyf.unr.edu.ar

<sup>2</sup> ICiAgro Litoral, Universidad Nacional del Litoral, CONICET, Kreder 2805, Esperanza, 3080HOF, Argentina; iciagro@santafe-conicet.gov.ar

<sup>3</sup> IFISE, Universidad Nacional de Rosario, CONICET, Suipacha 531, S2002LRK, Rosario, Argentina; ifise@rosario-conicet.gov.ar

\* Correspondence: lsvetaz@fbioyf.unr.edu.ar; Tel: +54-9341-153-061322 (L.A.S.); mderita@fbioyf.unr.edu.ar, Tel: +54-9341-155-317769 (M.G.D).

## TABLE OF CONTENTS

|                                                                                     |    |
|-------------------------------------------------------------------------------------|----|
| Figure S1. $^1\text{H}$ NMR (300 MHz) spectrum of <b>1</b> in $\text{CDCl}_3$ ..... | S3 |
| Figure S2: $^{13}\text{C}$ NMR (300 MHz) spectrum of <b>1</b> $\text{CDCl}_3$ ..... | S3 |
| Figure S3. EI mass spectrum of <b>1</b> .....                                       | S4 |
| Figure S4. $^1\text{H}$ NMR (300 MHz) spectrum of <b>2</b> in $\text{CDCl}_3$ ..... | S4 |
| Figure S5: $^{13}\text{C}$ NMR (300 MHz) spectrum of <b>2</b> $\text{CDCl}_3$ ..... | S5 |
| Figure S6. EI mass spectrum of <b>2</b> .....                                       | S5 |

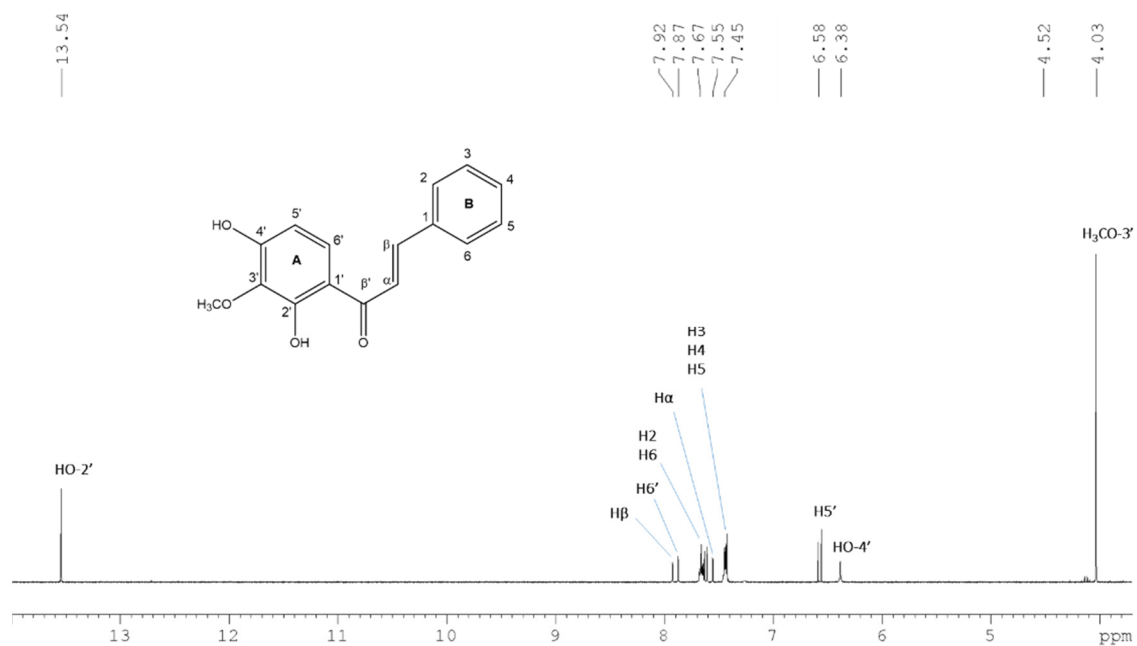

**Figura S1:** <sup>1</sup>H NMR spectrum of 2',4'-dihydroxy-3'-methoxychalcone (1)

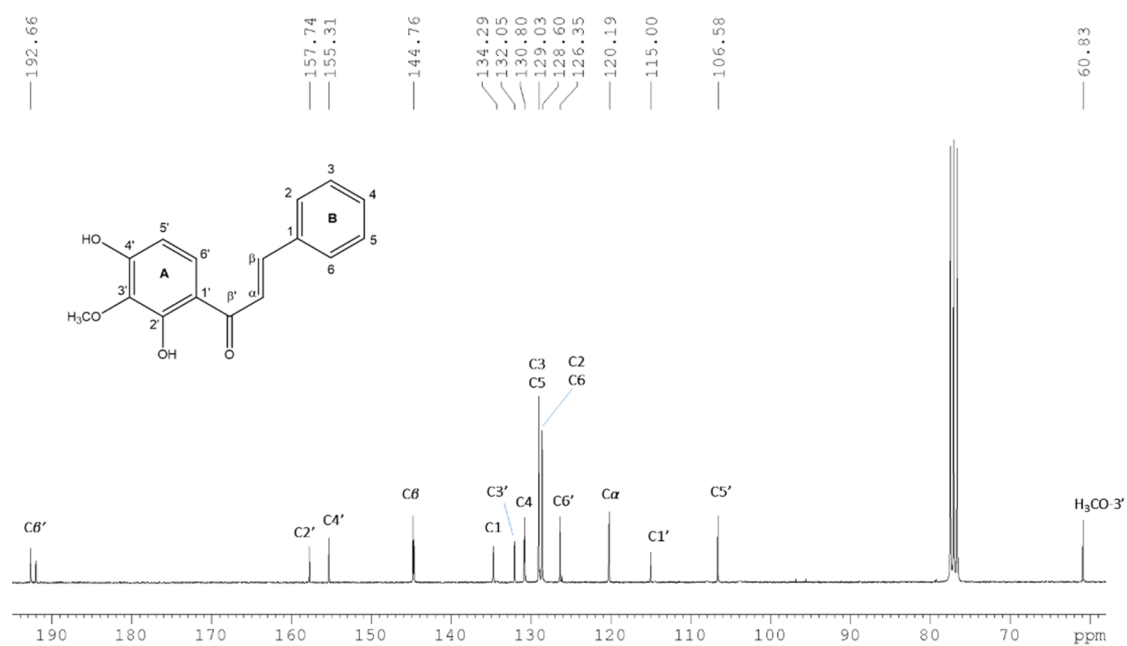

**Figura S2:** <sup>13</sup>C NMR spectrum of 2',4'-dihydroxy-3'-methoxychalcone (1)

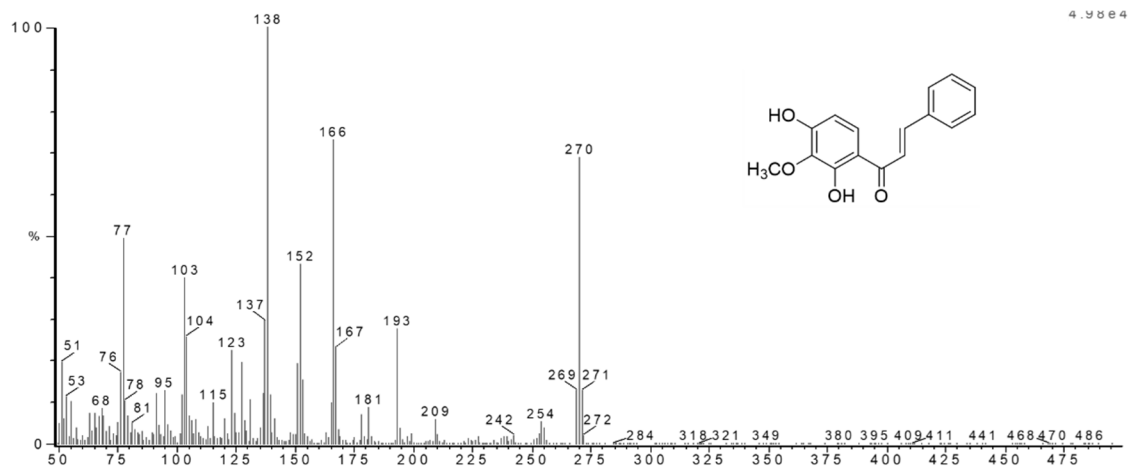

**Figure S3:** EI mass spectrum of 2',4'-dihydroxy-3'-methoxychalcone (1)

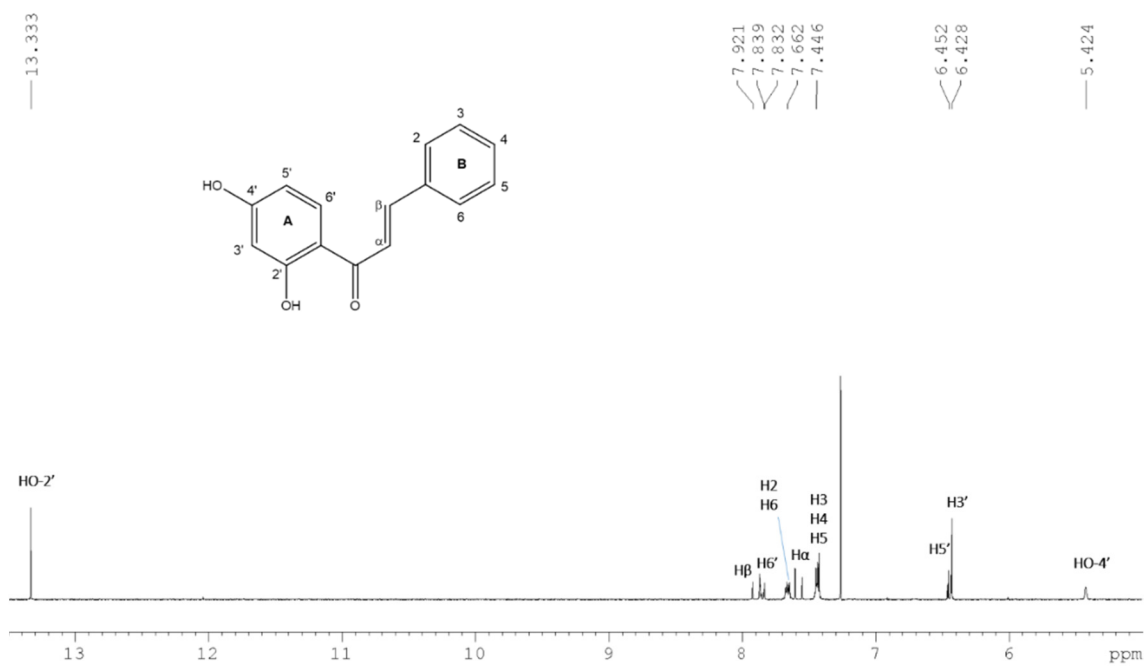

**Figure S4:**  $^1\text{H}$  NMR spectrum of 2',4'-dihydroxychalcone (2)

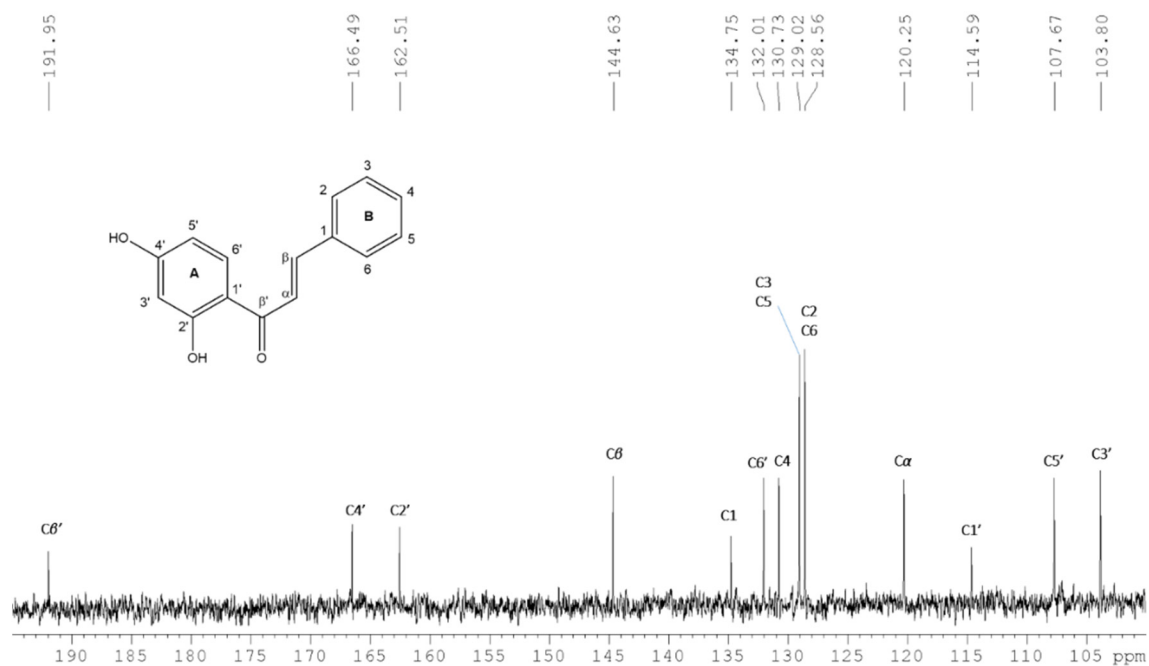

**Figura S5:**  $^{13}\text{C}$  NMR spectrum of 2',4'-dihydroxychalcone (2)

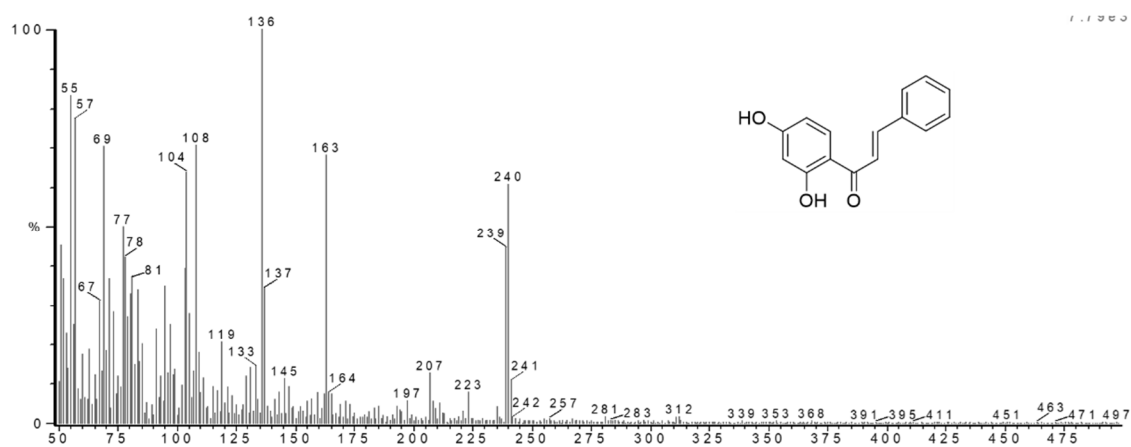

**Figura S6:** EI mass spectrum of 2',4'-dihydroxychalcone (2)
